# Supplementary material
Source: PubMed Central journal article supplement (PMC4902604)
Supplement: supp_pp.16.00209_PP2016-00209R2_Supplemental_Material_fig2.pdf [file supp_pp.16.00209_PP2016-00209R2_Supplemental_Material_fig2.pdf]

**A**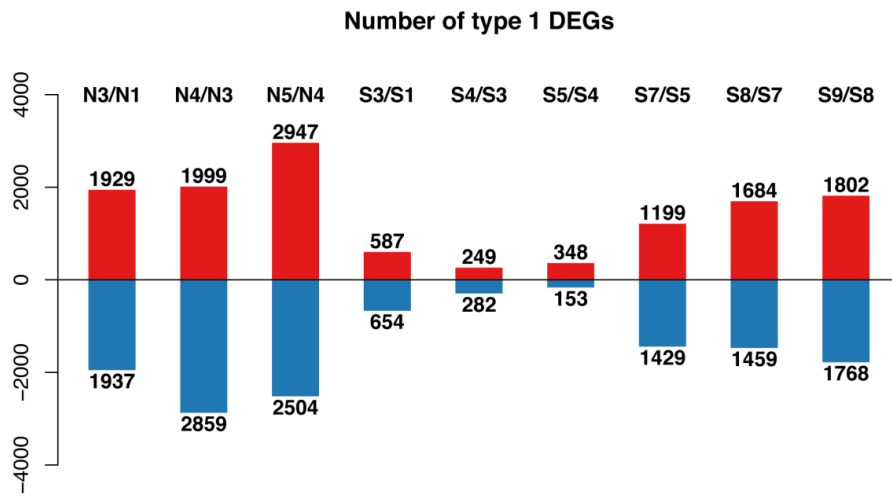**B**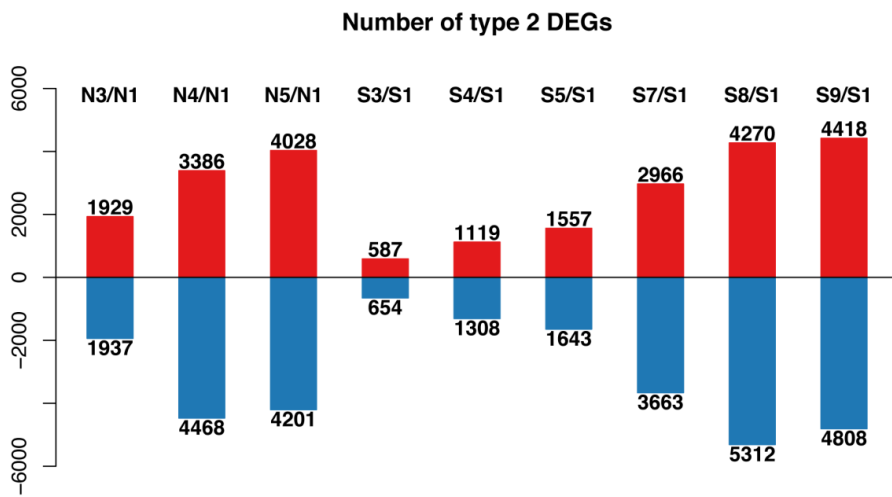**C**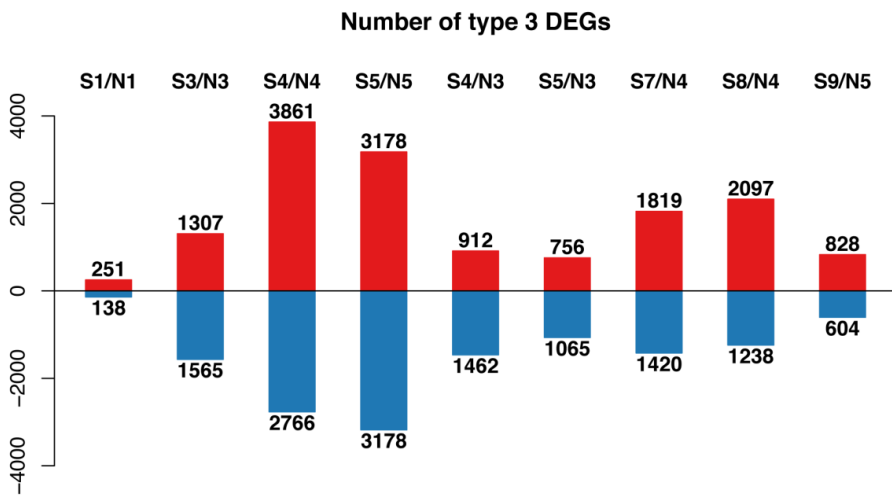

**Supplemental Figure S2. Bar plot showing the number of DEGs between different samples.**

(A) Type 1 DEGs were genes differentially expressed between samples at two adjacent time points in the normal ovary and super ovary. (B) Type 2 DEGs were genes differentially expressed between the sample at a later time point and the sample at the earliest time point (N1 or S1) in the normal ovary and super ovary. (C) Type 3 DEGs were genes differentially expressed between samples from the super ovary and normal ovary at the same time points or the same developmental stages.
