# Supplementary material
Source: PubMed Central journal article supplement (PMC4902604)
Supplement: supp_pp.16.00209_PP2016-00209R2_Supplemental_Material_fig3.pdf [file supp_pp.16.00209_PP2016-00209R2_Supplemental_Material_fig3.pdf]

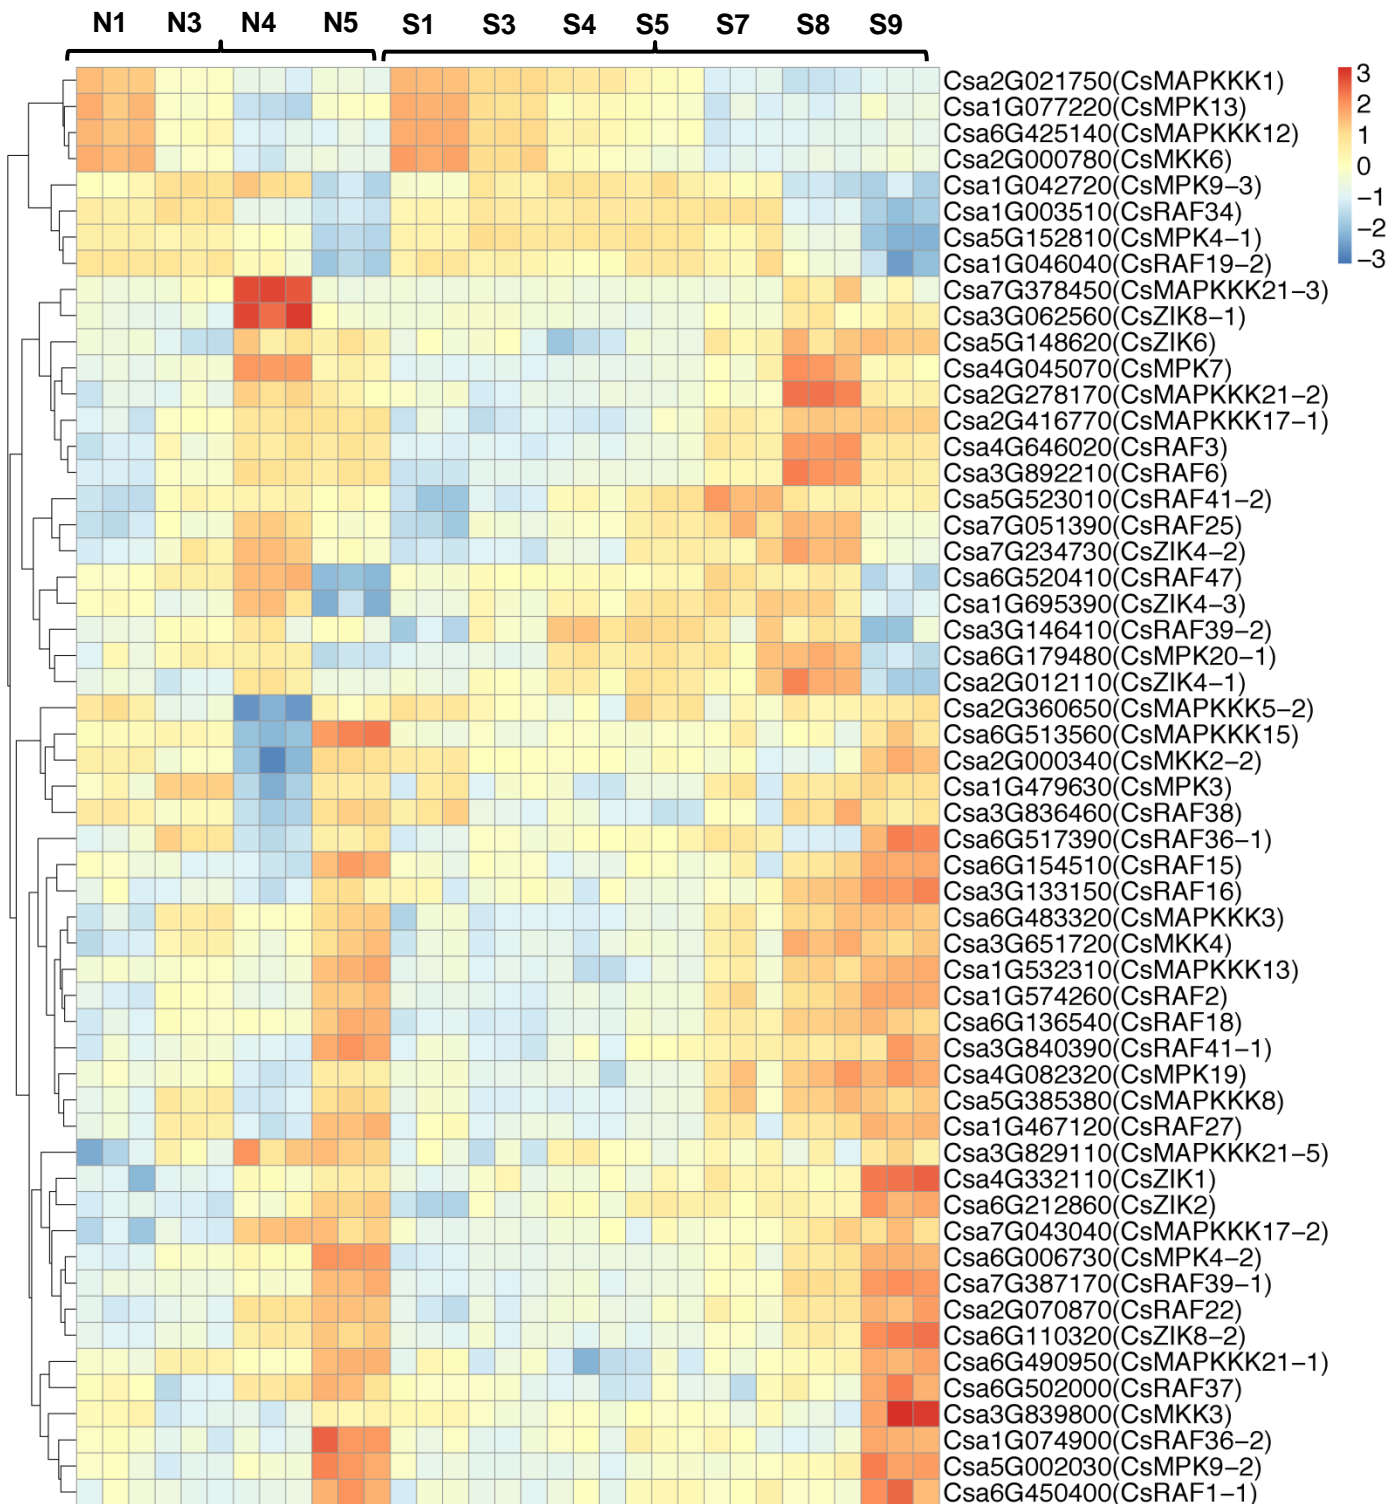

**Supplemental Figure S3. Expression of MAP kinase family genes across developmental stages in the normal ovary and super ovary.**

Heat map expression profiles of MAP kinase family genes at different stages of corolla development in cucumber. The colors in the squares represented the Z-score values of normalized gene expression levels.
