# Supplementary material
Source: PubMed Central journal article supplement (PMC4902604)
Supplement: supp_pp.16.00209_PP2016-00209R2_Supplemental_Material_fig4.pdf [file supp_pp.16.00209_PP2016-00209R2_Supplemental_Material_fig4.pdf]

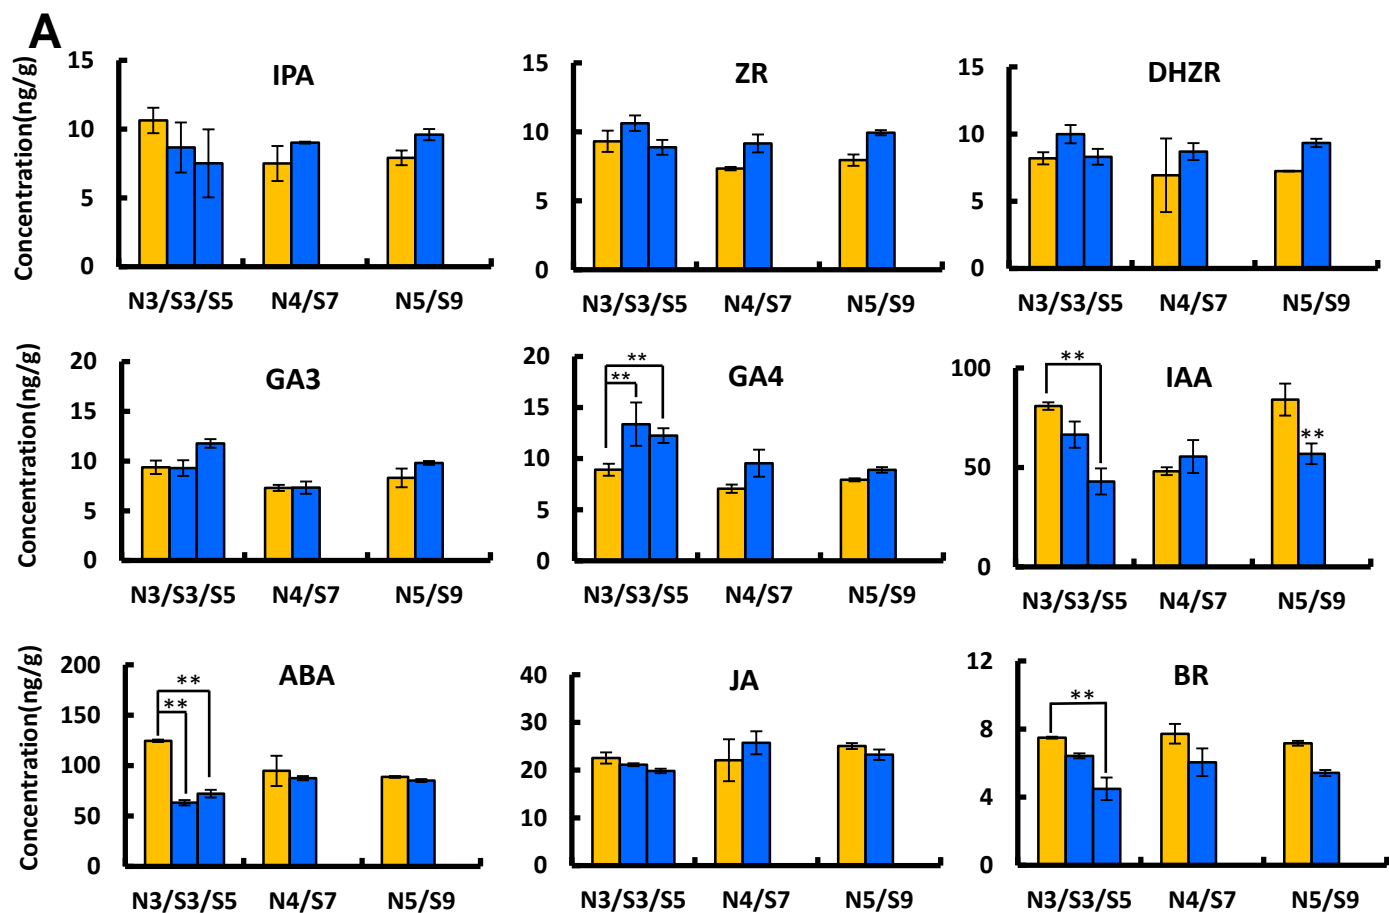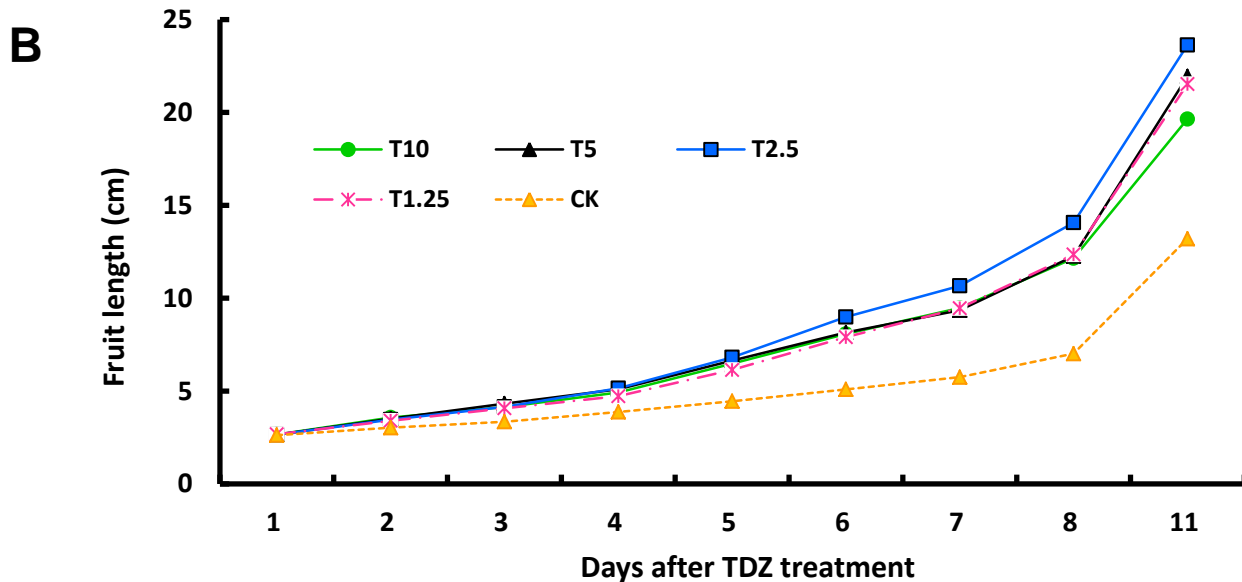

**Supplemental Figure S4. Hormone measurements and cytokinin effect on the fruit growth rate in cucumber.**

(A) The content of 3-Indole propionic acid (IPA), trans-zeatin riboside (ZR), dihydrogen zeatin riboside (DHZR), gibberellins (GA3, GA4), auxin (IAA), abscisic acid (ABA), jasmonic acid (JA) and brassinosteroid (BR) in the fruits of normal ovary (orange) and super ovary (blue) at three stages: green yellow bud (N3, S3, S5), yellow bud (N4, S7) and flowering (N5, S9). Three biological replicates were performed and the bars represented standard deviations. Double asterisks represented significant difference as compared to that in the normal ovary at P < 0.01 (unpaired t-test). (B) Effects of different TDZ treatments on the fruit growth rate in cucumber. Water treatment was used as control.
