# Supplementary material
Source: PubMed Central journal article supplement (PMC4902604)
Supplement: supp_pp.16.00209_PP2016-00209R2_Supplemental_Material_tbl1.pdf [file supp_pp.16.00209_PP2016-00209R2_Supplemental_Material_tbl1.pdf]

1 **Table S1. Quantifications of seeded fruits and seeds per fruit in the normal and**  
 2 **super ovaries depending on the timing of hand pollination**

| <b>Timing of hand pollination</b> | <b>DAL3</b>         | <b>DAL4</b> | <b>DAL5</b> | <b>DAL6</b> | <b>DAL7</b> | <b>DAL8</b> | <b>DAL9</b> |    |
|-----------------------------------|---------------------|-------------|-------------|-------------|-------------|-------------|-------------|----|
| <b>% of seeded fruit</b>          | <b>normal ovary</b> | 57.1        | 96          | 92.3        | 90.5        | 23.5        | 0           | -- |
|                                   | <b>super ovary</b>  | --          | --          | 100         | 75          | 30.8        | 27.8        | 0  |
| <b>Seeds per fruit</b>            | <b>normal ovary</b> | 31.1        | 142.4       | 166.2       | 140.2       | 24.4        | 0           | -- |
|                                   | <b>super ovary</b>  | --          | --          | 45.8        | 38.5        | 15.5        | 2.4         | 0  |

3 Values are the average of n>100 fruits.

4
